# Supplementary material for: Hydrogen bonding probes of phenol –OH groups
Source: Royal Society of Chemistry journal article supplement (doi:10.1039/c2ob27117f), 2012-12-05
Supplement: c2ob27117f.pdf [file c2ob27117f.pdf]

## Supporting information

# Hydrogen Bonding Probes of Phenol –OH Groups: Shielding Ranges, Solvent Effects and Temperature Coefficients of $^1\text{H}$ NMR Shieldings and –OH Diffusion Coefficients

Vassiliki G. Kontogianni<sup>a</sup>, Pantelis Charisiadis<sup>a</sup>, Alexandra Primikyri<sup>a</sup>, Charalambos G. Pappas<sup>a</sup>, Vassiliki Exarchou<sup>b</sup>, Andreas G. Tzakos<sup>a</sup> and Ioannis P. Gerothanassis<sup>\*a</sup>

<sup>a</sup> Section of Organic Chemistry & Biochemistry, Department of Chemistry, University of Ioannina, Ioannina GR-45110, Greece. Fax: +302651008379; Tel: +302651008389; E-mail: igeroth@uoi.gr

<sup>b</sup> NMR Center, University of Ioannina, Ioannina GR-45110, Greece. E-mail: vexarc@cc.uoi.gr

## Table of Contents

|                                                                                        |     |
|----------------------------------------------------------------------------------------|-----|
| Figure S1. $^1\text{H}$ - $^{13}\text{C}$ HMBC NMR spectrum of quercetin, 1.           | 2   |
| SCHEME S1. Structural CSD search query.                                                | 2   |
| FIGURE S2. Selected regions of $^1\text{H}$ NMR of compound, 10.                       | 3   |
| FIGURE S3. Selected regions of $^1\text{H}$ - $^{13}\text{C}$ HMBC NMR of compound 10. | 4   |
| TABLE S1. NMR Spectroscopic Data for compound 10.                                      | 4-5 |
| FIGURE S4. Selected regions of $^1\text{H}$ NMR of compound 26.                        | 5   |
| FIGURE S5. Selected areas of $^1\text{H}$ - $^{13}\text{C}$ HMBC NMR of compound 26.   | 6   |
| TABLE S2. NMR Spectroscopic Data for compound 26.                                      | 6   |
| FIGURE S6. X-ray structure of xanthine oxidase in complex with quercetin               | 7   |

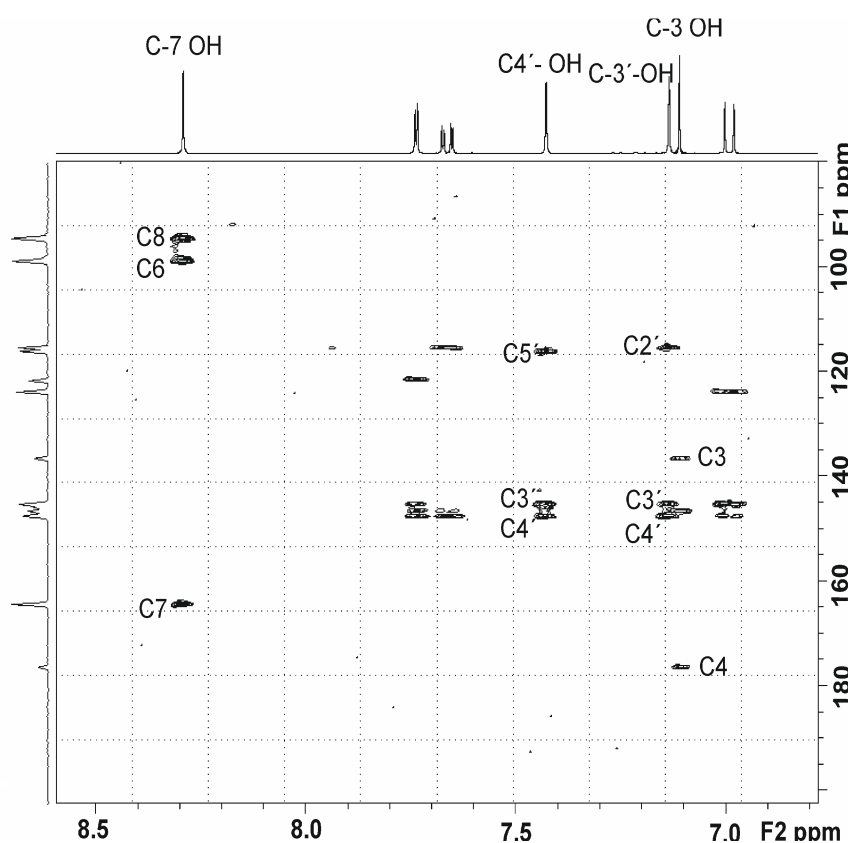

**FIGURE S1.** 2D  $^1\text{H}$  -  $^{13}\text{C}$  HMBC NMR spectrum (500 MHz) of quercetin, **1**, in  $\text{CD}_3\text{CN}$ , concentration 5 mM, with the presence of 2  $\mu\text{L}$  picric acid, 8 mM in  $\text{CD}_3\text{CN}$  (number of scans = 12, experimental time = 3 h).

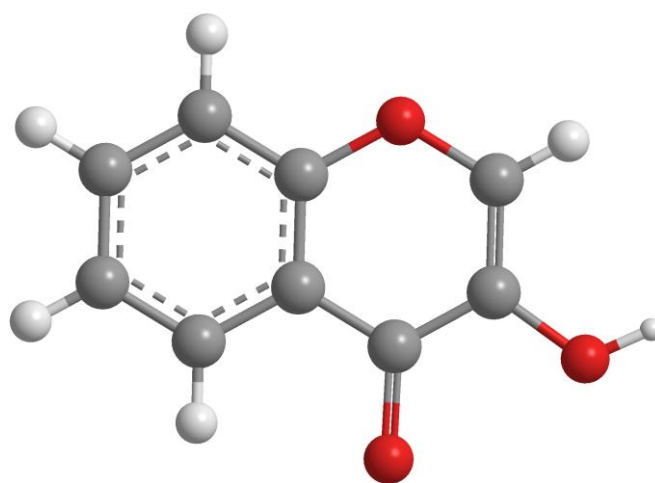

**SCHEME S1.** Structural CSD search query.

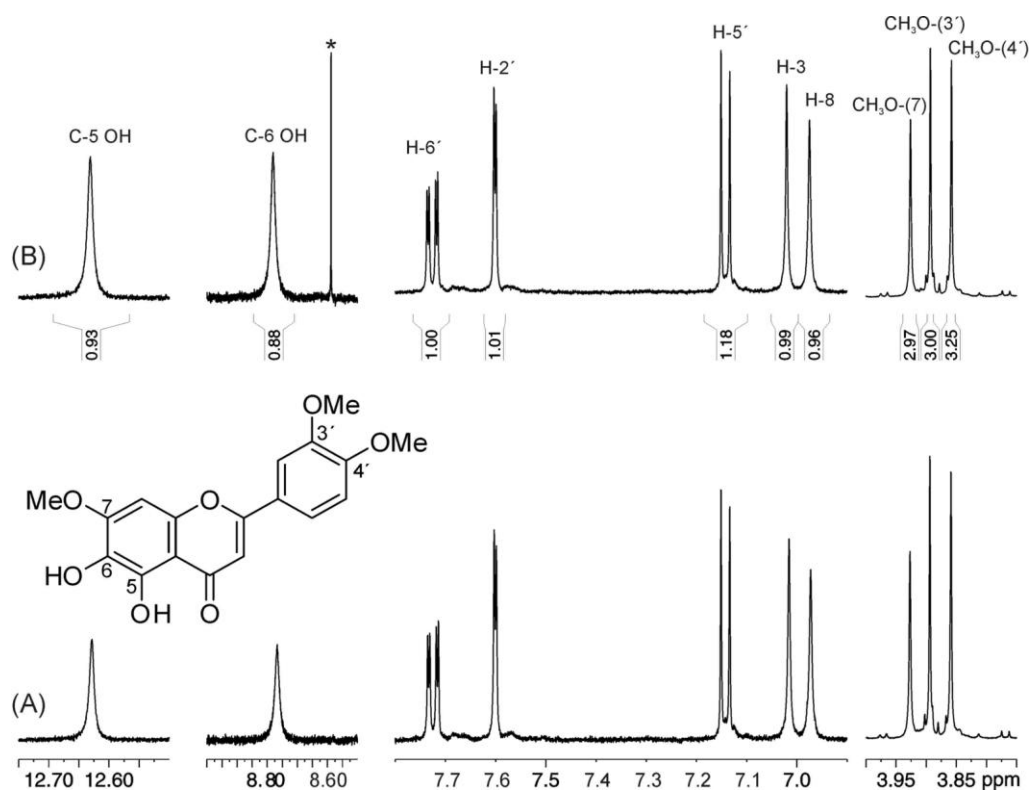

**FIGURE S2.** Selected regions of 500 MHz  $^1\text{H}$  NMR of compound, **10**, in 0.5 mL  $\text{DMSO}-d_6$  ( $T = 288\text{ K}$ , number of scans = 256, experimental time = 34 min). (A) without the addition of picric acid, (B) after the addition of 3  $\mu\text{L}$ , 2 mM in  $\text{DMSO}-d_6$ , solution of picric acid. The peak with the asterisk denotes the absorption of picric acid.

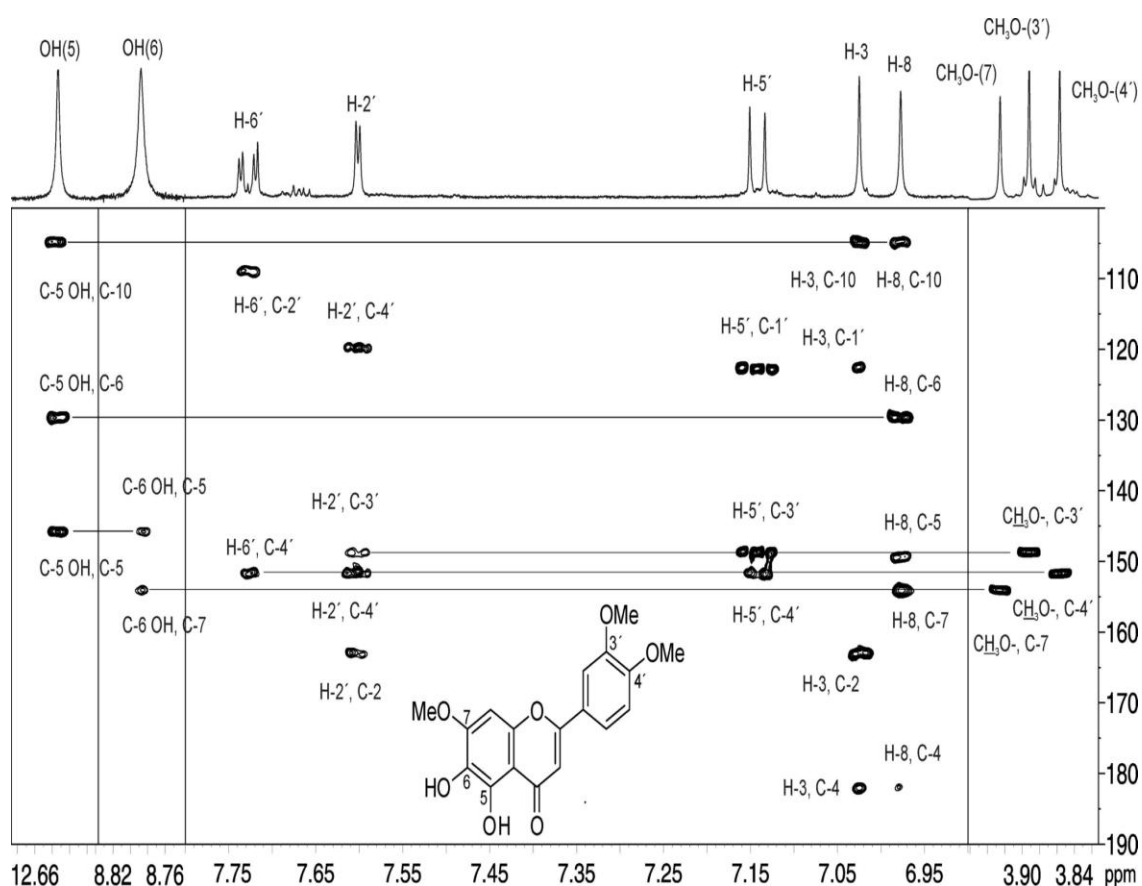

**FIGURE S3.** Selected regions of a 500 MHz 2D  $^1\text{H}$ - $^{13}\text{C}$  HMBC NMR ( $T = 288\text{K}$ , number of scans = 120, experimental time = 16 h) of compound, **10**, in 0.5 mL  $\text{DMSO}-d_6$ , after the addition of 3  $\mu\text{L}$ , 2 mM in  $\text{DMSO}-d_6$ , solution of picric acid. The common cross-peaks of -OH groups, C-5 OH and C-6 OH, and of the methoxy groups, are demonstrated.

**TABLE S1.** NMR Spectroscopic Data (500 MHz,  $\text{DMSO}-d_6$ ) for compound **10**.

| notation | $\delta_{\text{C}}$ | $\delta_{\text{H}}$ ( $J$ in Hz) |
|----------|---------------------|----------------------------------|
| 2        | 163.2               | —                                |
| 3        | 103.2               | 7.02, s                          |
| 4        | 181.98              | —                                |
| 5        | 145.69              | 12.63, s                         |
| 6        | 129.62              | 8.79, s                          |
| 7        | 154.04              | —                                |
| 8        | 90.99               | 6.97, s                          |
| 9        | 149.62              | —                                |
| 10       | 104.74              | —                                |
| OMe(7)   | 56.04               | 3.93, s                          |
| 1'       | 122.5               | —                                |
| 2'       | 108.91              | 7.60, d (2.2)                    |
| 3'       | 148.64              | —                                |
| 4'       | 151.64              | —                                |
| 5'       | 111.3               | 7.14, d (8.7)                    |
| 6'       | 119.7               | 7.72, dd (2.1, 8.6)              |

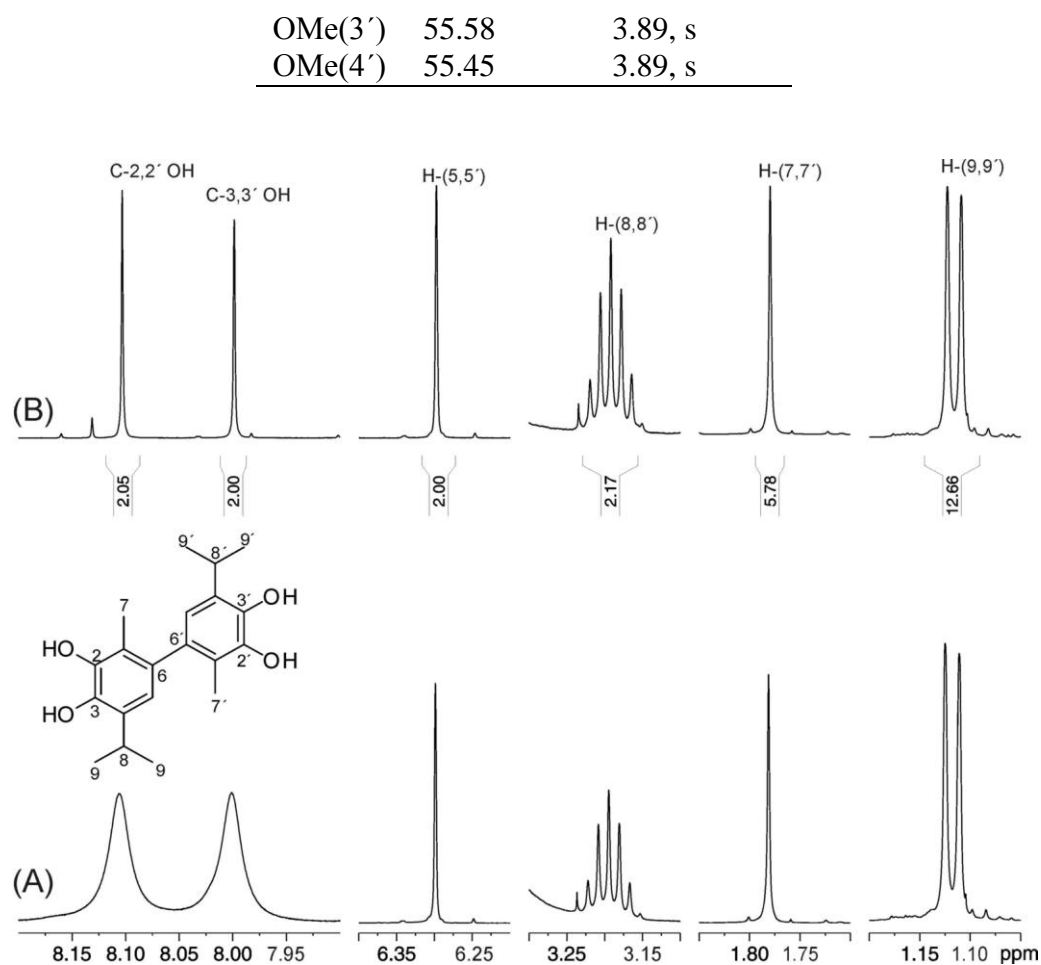

**FIGURE S4.** Selected regions of 500 MHz  $^1\text{H}$  NMR of compound, **26**, in 0.5 mL  $\text{DMSO-}d_6$  ( $T = 289\text{ K}$ , number of scans = 128, experimental time = 17 min). (A) without the addition of picric acid, (B) after the addition of 13  $\mu\text{L}$ , 10 mM in  $\text{DMSO-}d_6$ , solution of picric acid.

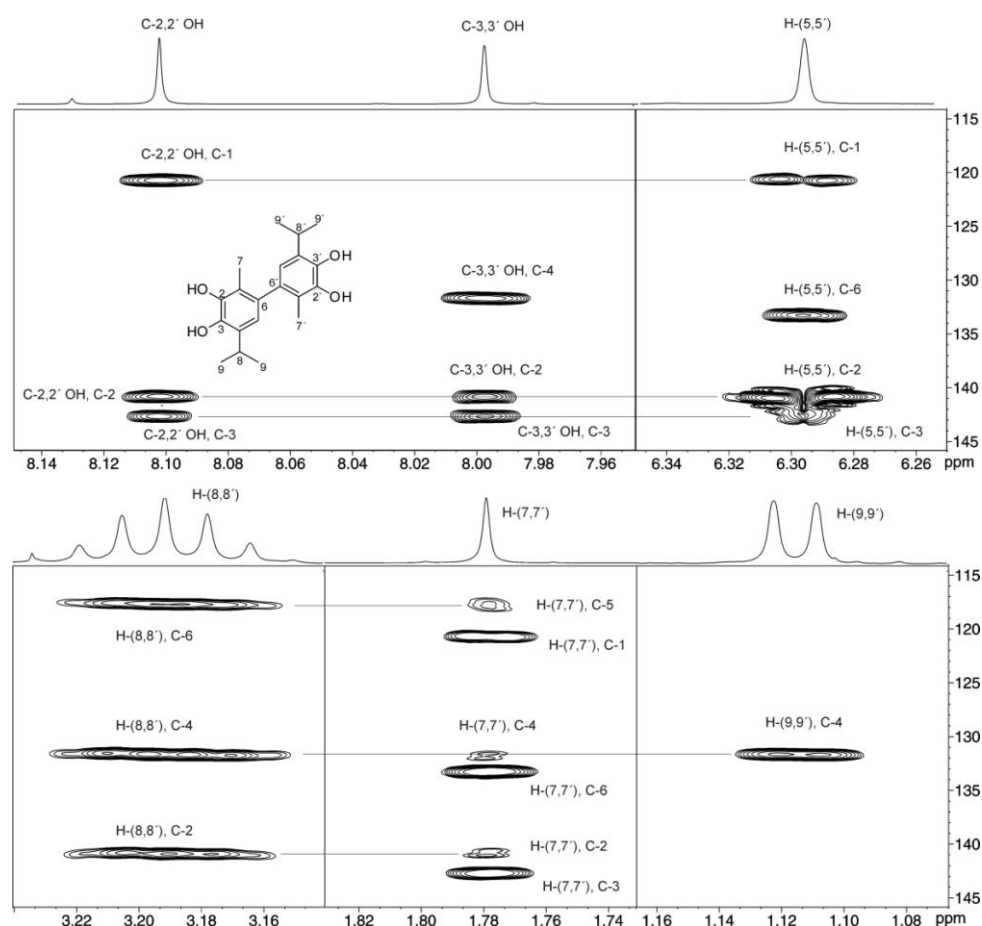

**FIGURE S5.** Selected areas of 500 MHz 2D  $^1\text{H}$ - $^{13}\text{C}$  HMBC NMR ( $T = 289\text{ K}$ , number of scans = 76, experimental time = 10 h) of compound, **26**, in 0.5 mL  $\text{DMSO-}d_6$ , with the addition of 13  $\mu\text{L}$ , 10 mM in  $\text{DMSO-}d_6$ , solution of picric acid. The common cross-peaks between the OH groups are indicated.

**TABLE S2.** NMR Spectroscopic Data (500 MHz,  $\text{DMSO-}d_6$ ) for compound **26**.

| notation | $\delta_{\text{C}}$ | $\delta_{\text{H}}$ ( $J$ in Hz) |
|----------|---------------------|----------------------------------|
| 1, 1'    | 120.65              | —                                |
| 2, 2'    | 140.95              | 8.10, s                          |
| 3, 3'    | 142.7               | 8.00, s                          |
| 4, 4'    | 131.65              | —                                |
| 5, 5'    | 117.57              | 6.30, s                          |
| 6, 6'    | 133.30              | —                                |
| 7, 7'    | 13.47               | 1.78, s                          |
| 8, 8'    | 26.36               | 3.19, m                          |
| 9, 9'    | 22.90               | 1.12, d (6.9)                    |

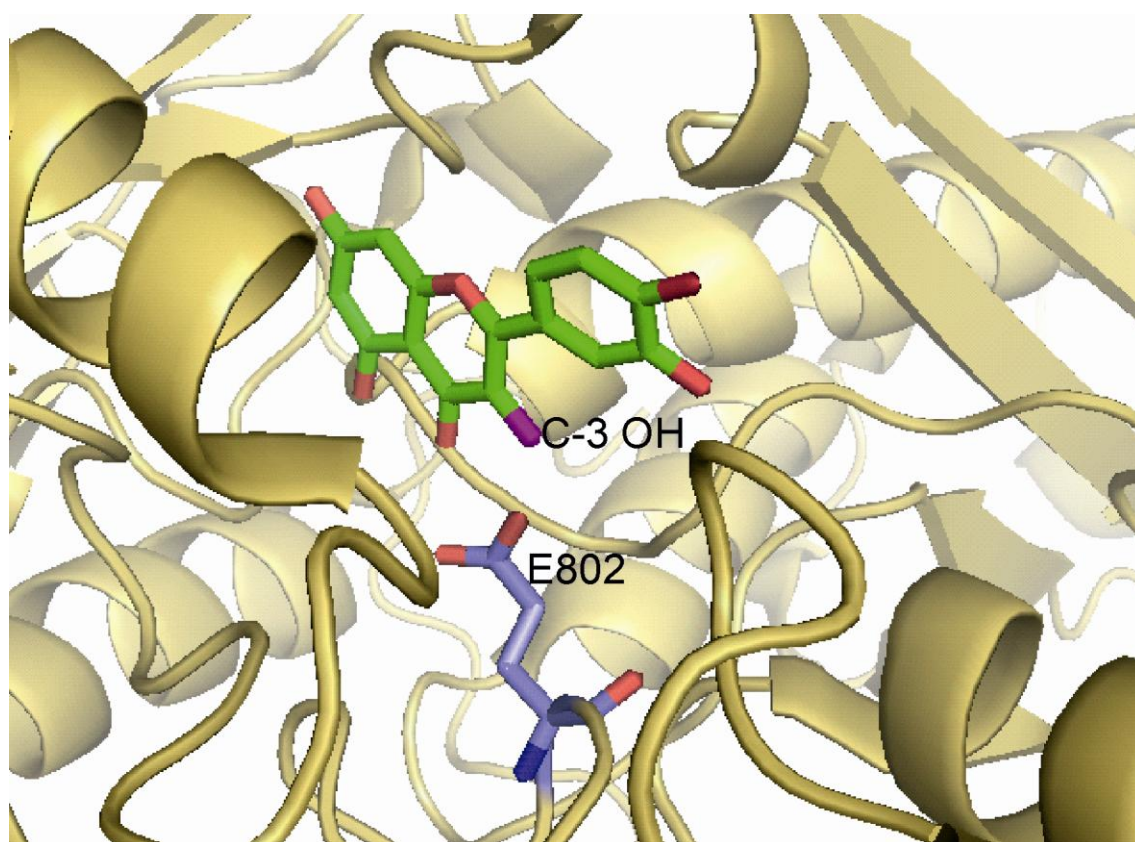

**FIGURE S6.** X-ray structure of xanthine oxidase in complex with quercetin (pdbid: 3NVY). The C-3 OH of quercetin interacts with the glutamate 802 (E802) of the protein (distance between OE1 of E802 and the C-3 OH was measured to 2.07 Å).
